# Supplementary material for: The PARP Inhibitor AZD2461 Provides Insights into the Role of PARP3 Inhibition for Both Synthetic Lethality and Tolerability with Chemotherapy in Preclinical Models
Source: Oxford University Press journal article supplement (doi:10.1158/0008-5472.can-15-3240), 2016-08-22

**Supplementary Material**

**Materials and Methods**

***In order of reference in the main text***

**Formulation of compounds for *in vivo* studies**

AZD2461 was dissolved at 2 mg/mL in 0.5% w/v hydroxy propyl methyl cellulose plus 0.1% v/v Tween 80 (0.5% HPMC) in water without polysorbate (vehicle: 0.5% HPMC). Olaparib was prepared in 10% DMSO, 10% HP-B-CD (2-hydroxypropyl-beta-cyclodextrin) in PBS (vehicle: 10% DMSO, 10% HP-B-CD). Temozolomide was formulated as a suspension in 100% corn oil (vehicle: 100% corn oil).

**Cell line and culture methods**

Human lung carcinoma A549 cells were grown in Dulbecco’s Modified Eagle Medium (DMEM) supplemented with 15% FCS, L-glutamine, penicillin, and streptomycin. Human breast cancer cell lines MDA-MB-436, T47D, BT549, and MDA-MB231 were grown in RPMI 1640 media supplemented with 10% FBS, L-glutamine. SUM1315MO2 and SUM149PT were grown in Ham’s F-12 media supplemented with 5% FBS, 5 µg/mL insulin and 10 ng/mL EGF (for SUM1315MO2) or 1 µg/mL hydrocortisone (for SUM149PT). Human cervical HeLa KB31 and KBA1 cell lines were grown in DMEM/F12 supplemented with 10% PBS, L-glutamine. The HCT-15 colorectal cell line was grown in RPMI 1640 media supplemented with 10% FBS and L-glutamine. MRE11A mutation status and sensitivity of HCT-15 cells to olaparib have also been described previously (1).

**Alkaline comet assay**

A549 cells were pre-treated for 1 hour at 37⁰C with 0.05% dimethyl sulfoxide (DMSO), olaparib, or AZD2461 (500 nM for both). Cells were treated with 30 Gy γ-IR (on ice) and allowed to recover at 37⁰C for the indicated time.

**Immunofluorescence analysis**

For the PAR synthesis assay, olaparib/AZD2461 (500 nM) or dimethyl sulfoxide (DMSO) was added to the cells 1 hour before treatment with 10 mM H2O2 in phosphate buffered saline (PBS) or PBS alone for 15 minutes on ice. Following treatment, cells were washed in PBS and placed in warm medium for 1 minute. Cells were then washed and fixed in paraformaldehyde (PFA) for 5 minutes, then in methanol at -20°C for 30 minutes. Cells were then made permeable by 2 minutes in PBS plus 0.2% Triton X-100 and blocked in 5% non-fat dried milk (NFDM) for 30 minutes. Poly(ADP ribose; PAR) was visualized using rabbit polyclonal anti-PAR antibody (Trevigen, 1:300) and Alexa Fluor® 488 Goat Anti-Rabbit IgG (H+L) secondary antibody (Invitrogen).

For γH2AX analysis, A549 wild-type cells, A549 cells carrying stable expression of APLF shRNA (1), and mouse embryonic fibroblasts (MEFs) derived from wild-type (PAR polymerase [PARP]3 +/+) and PARP3 knockout (PARP3 -/-) mice were grown on cover slips pretreated with 500 nM olaparib or AZD2461 for 1 hour before being treated with 2 Gy ionizing radiation and fixed at the indicated times. Cells were then fixed in PBS plus 4% paraformaldehyde for 5 minutes, made permeable with 2 minutes in PBS plus 0.2% Triton X‑100, and blocked in 5% bovine serum albumin (BSA) for 30 minutes. Cells were then immuno-labeled with mouse anti-γH2AX (pSer139, Millipore clone JBW301, 1:1000) and rabbit anti-CENPF (Abcam Ab5, 1:500). Secondary labeling was carried out using Alexa Fluor® 555 Goat Anti-Rabbit IgG secondary antibody and Alexa Fluor® 488 Goat Anti-Mouse IgG secondary antibodies (Invitrogen). The cells were washed, stained with DAPI (Sigma), and mounted in Vectashield (Vector Labs). The γH2AX foci were then counted in CENPF-negative (G1) cells using a Nikon Eclipse 50i microscope.

**PARP-3 Bio-NAD *in vitro* assay**

PARP-3 protein was expressed in *E.coli* and purified using Ni-NTA resin (Qiagen) as described (2). Ribosylation reaction mix (25 μL) contained 50 mM Tris-HCl pH 8, 2 mM MgCl2, 1% glycerol, 1.5 nM DTT, 250 nM PARP3 enzyme, and either AZD2461 or olaparib at indicated concentrations. The reaction mix was pre-incubated for 5 minutes room temperature (RT) prior to adding 2.5 μL Bio-NAD+ (Trevigen) and 100 ng Sau3A-cut peGFP-C1 plasmid (Clontech). The samples were incubated for 5 minutes at 30ºC. The reaction was stopped by 5 μL of SDS sample buffer (pH 6.0) for 8 minutes at RT. Products were separated by SDS-PAGE, blotted onto nitrocellulose membrane, and blocked in 5% BSA in TBS for 30 minutes. The signal was detected using Streptavidin-HRP (GE Healthcare, Little Chalfont, UK; 1:30 000) for 1 hour RT and developed with enhanced chemiluminescent (ECL; GE Healthcare). PAR signal integrated density was quantified by ImageJ software and was used to assess AZD2461 and olaparib IC50 values for PARP3 inhibition.

**Clonogenic and cell proliferation assays**

Cells were grown at 37°C, 95% air, 5% CO2 until about 70% confluent and sub-cultured at least twice prior to seeding for clonogenic assay. Cells were detached from the flask using trypsin and washed with medium. The pellet was dislodged in growth medium into a single-cell suspension and counted in a Nucleocounter.

For the clonogenic assay, a cell seeding study for each cell line was carried out to determine the appropriate cell seeding number (from the linear section on the seeding curve = number of cell seeded versus number of colonies obtained). The cell seeding numbers for individual cell lines were as follows: MDA‑MB-436 (500/2 mL), SUM1315MO (2000/2 mL), SUM149PT (1000/2 mL), T47D (750/2 mL), BT549 (1500/2 mL), MDA-MB-231 (1000/2 mL). Olaparib and AZD2461, prepared as 10 mM stock solution in 100% DMSO, were added in final concentrations 0, 0.123, 0.37, 1.1, 3.3, and 10 μM to the cells. Plates were incubated at 37°C, 95% air, 5% CO2 until colonies of >50 have formed (approximately 7–14 days after dosing). For Giemsa staining, medium was removed from wells and colonies stained with 600 μL of Giemsa stain (Sigma catalogue number 48900-1L-F) per well. The stain was left for 20 minutes at room temperature. Excess stain was washed with a steady stream of tap water and the plates were air dried. Colonies were counted using Colcount (Oxford Optronix).

For the sulphorhodamine B (SRB) assay, cells were seeded into 96-well plates (6000 cells/well) in triplicate in 90 μL of growth medium. AZD2461 or olaparib were added in final concentrations of 0, 1, 3, 10, 30, and 200 nM 1 hour prior to addition of 0, 3, 5, 7, 10, 12, and 15 μg/mL of MMS. Cells were incubated for 18 hours; then medium was replaced with 200 μL fresh medium. Plates were incubated for a further 72 hours before cells were fixed (10% trichloracetic acid, 100 μL/well) for 30 minutes at 4ºC. Wells were washed with water and stained with 0.4% SRB (Sigma) in 1% acetic acid for 15 minutes at room temperature. Excess stain was removed by washing with 1% acetic acid and dry stained precipitate was dissolved with 100 μL/well 10 mM Tris buffer.

**Rodent experiments**

For bone marrow analysis, mice were culled at day 4, 6 (n = 8 per group), and 8 (n = 3 per group). Rats (n = 8 per group) were culled on day 5 at 2 hours after the final dose.

**Preparation of bone marrow cells for flow cytometry analysis**

A single femur from each animal was excised, the ends were cut off, and bone was flushed out with 1 mL solution of 50% PBS/50% FBS using a 21 G needle and syringe. Samples were spun at 1600 rpm for 5 minutes at 4°C. The supernatant was discarded and the pellet washed in 2 mL PBS, spun again, and re-suspended in 3 mL PBS.

**RNA isolation and RT-PCR gene expression analysis**

Following extraction of total RNA, the samples were DNase treated (RNase-Free DNase Set, Qiagen) to remove potential DNA contamination. RNA purity and concentration were determined spectrophotometrically (260/280 >1.9). RNA integrity was assessed on an Agilent 2100 Bioanalyzer using RNA 6000 Nano Chip.

Human, rat, and mouse PARP1, 2, and 3 sequences were aligned using the Megalign module in DNAstar and blast searched using the BLAST tool from the NCBI website to ensure target specificity. Assay efficiencies were calculated for each primer set to ensure template DNA from all species were amplified similarly.

Sequences for primers/probes for TaqMan assay were as follows: PARP1: the sequence for the probe 5’-AACTTCTTGGGATACTTTG-3’, the sequence of the forward primer
5’-GCCTGGCACTCGAAAAACTTC-3’, the sequence of the reverse primer
5’-CGTCCTGGCCATAGTCAATCTC-3’. PARP2: Life Technologies Assay ID Hs00193931_m1. PARP3: the sequence for the probe 5’-AAGGACTTTAAGAAGAAATTT-3’, the sequence of the forward primer 5’-ACCTGCCTGGAAGATGCAAAG-3’, the sequence of the reverse primer 5’-CGCTCCTCCCATTTGTTTTTAGTCT-3’. PPIA: Life Technologies Assay ID Mm02342429_g1. Sequences for primers/probes for SybrGreen assays were as follows: assay of primers for PARP3: forward primer
5’-TTCCAGGCCCACTCCAAACTGGG-3’, the sequence of the reverse primer
5’-GTTGGTGCCATGCCACAGCAGC-3’. PPIA: the sequence of the forward primer
5’-TATCTGCACTGCCAAGACTGAGTG-3’, the sequence of the reverse primer
5’-CTTCTTGCTGGTCTTGCCATTCC-3’. YWHAZ: the sequence of the forward primer
5’-GATGAAGCCATTGCTGAACTT-3’, the sequence of the reverse primer
5’-GTCTCCTTGGGTATCCGATGTC-3’. RT-PCR gene expression analyses were performed on Applied Biosystems 7900HT detection system using TaqMan RNA-to-Ct
1-Step kit and Power SybrGreen RNA-to-Ct 1-step kit (Applied Biosystems).

Gene expression analysis (qRT-PCR) was carried out using a one-step protocol in 384-well format. Individual reactions consisted of 5 µL of 2x TaqMan universal master mix (TaqMan RNA-to-Ct 1-Step kit, Applied Biosystems), 0.5 µL Taqman gene expression assay, 0.25 µL of reverse transcriptase, and 2 µL (12.5 ng) of RNA template. In a final assay volume of 10 µL/well, all samples were run in duplicate. The assay plates were run on the Applied Biosystems 7900HT instrument using the following cycling conditions: RT for 15 minutes at 48ºC, polymerase activation at 95ºC for 10 minutes, followed by 40 cycles of PCR (95ºC for 15 seconds and 60ºC for 1 minute). Cycle threshold (Ct) values were extracted using SDS v2.0 software and further analyzed in Excel.

The SybrGreen qRT-PCR gene expression assays were also carried out in 384-well format, using the Power SybrGreen RNA-to-Ct 1-step kit (Applied Biosystems). The reaction mix (10 µL) consisted of 5 µL of RT-PCR mix (2x), 0.08 µL of RT enzyme mix, 0.2 µL each of forward and reverse primers (final concentration 200 nM), 2 µL of RNA template (final concentration 25 ng), and 2.52 µL of nuclease free water. The assay plates were run on Applied Biosystems 7900HT instrument using the following cycling conditions: RT at 48ºC/30 minutes followed by polymerase activation at 95ºC/10 minutes followed by 40 cycles of PCR (95ºC for 15 seconds and 60ºC for 1 minute) followed by a melting curve analysis.

Rat average ∆Ct was used as the reference level to calculate fold change differentials for assessment of PARP1‒3 gene expression levels. A two-tailed t-test with Welch’s correlation was applied to analyze differences between gene expression in rat versus mouse or human bone marrow cells.

**Triaging of medicinal chemistry output for reduced efflux liability**

Caco-2 assays were used to identify chemical series with reduced efflux liability. One was a BiAryl series that was later de-prioritized due to a lack of cellular potency and poor physical properties; the second was based on a piperidine ether series in which compounds demonstrated good cellular activity and physical properties along with a consistently low efflux liability in Caco-2 cells. Modification of the ether substituent beyond the simple methoxy ether resulted in an increase in metabolic liability and a consequent decrease in bioavailability. Thus, the piperidine ether series showed acceptable bioavailability in the rat but with a slightly reduced half-life compared with olaparib. Extensive work was undertaken to identify structural modifications that would reduce metabolic liability, yet retain the acceptable potency, physical properties, and reduced efflux liability of the piperidine ether series.

**Pharmacokinetics and pharmacodynamics of olaparib and AZD2461 in SW620 xenograft-bearing mice**

Animals were exposed to a single oral dose of the PARP inhibitor (AZD2461 or olaparib) and the compound levels in tumor (circles in **Suppl Fig. 2**) were measured at specific timepoints by liquid chromatography–mass spectrometry (LC-MS/MS). The level of PARP-1 activity (bars in **Suppl Fig. 2**) was determined by extracting proteins from tumors and measuring total PARP-1 protein and PAR formation following an *in vitro* PARP activation step using enzyme-linked immunosorbent assay-based Meso Scale Discovery platform assay. PAR formation in treated mice was compared with untreated control tumors. All data were normalized for total PARP-1 protein levels within each sample.

**CaCo-2 cell line compound permeability and efflux potential**

The CaCo-2 MDR1/P-glycoprotein (P-gp) expressing human colorectal cell line was seeded on Millicell plates (Millipore) in which they spontaneously differentiate into polarized confluent monolayers. Compounds were added to the cultures and the rate of directional transport of compounds from the apical (A) side to the basolateral (B) side (A2B, permeability) and from B to A side (B2A, efflux) over a 2-hour period was calculated. PARP inhibitor concentrations were quantified using LC-MS/MS. B2A/A2B efflux ratios >2 indicated that active drug efflux is occurring. Assays were performed by Cyprotex Discovery plc, Macclesfield, UK.

**Computer modeling of PARP catalytic sites**

PARP-3 images were generated from PARP-3 structural data (PDB ID: 3C49) (3) using the UCSF Chimera package (3), developed by the Resource for Biocomputing, Visualization, and Informatics at the University of California, San Francisco, with support from the NIH (National Center for Research Resources grant 2P41RR001081, National Institute of General Medical Sciences grant 9P41GM103311). PARP-1 versus PARP-3 comparisons were made by aligning PARP-1 (PDB ID: 3L3L) (5) and PARP-3 structural data, using the PyMOL Molecular Graphics System, v1.5.0.1, Schrödinger, LLC.

**Inhibitor activity in MDR1 (P-gp) cell lines**

KB31 (parental) and KBA1 (P-gp over-expressing) cell lines are paired cell line clones that have no detectable expression (KB31) or over-express full-length MDR1/P-gp cDNA (KBA1) (4). The GI50 of PARP inhibitors in the KB31 or KBA1 cell lines were determined using 96‑well 5-day sulforhodamine B (SRB) assays and active efflux was calculated as dose modification ratios (DMRs) in the absence and presence of 200 µM verapamil (Sigma) as was used in HCT-15 assays. HCT-15 cells are MRE11A mutant and over-express P-gp (MDR1) protein (1). The single-agent growth inhibition activity (GI50) of PARP inhibitors was determined using clonogenic assays as described in “Clonogenic assay” section above. Active compound efflux was determined using the DMR by the known P-gp inhibitor verapamil and was calculated as a ratio (fold‑enhancement of effect) of PARP inhibitor GI50 alone in HCT-15 cells divided by the GI50 of PARP inhibitor in the presence of 200 µM verapamil. DMRs >2 indicate that active drug efflux is modifying PARP inhibitor activity. The standard deviation (SD) and number of independent replicates per experiment (n) are as indicated.

**References**

**1**. Knights C, Riches L, Lau A, Mangena R, Avis T, Finn RS, et al. Preclinical evaluation of single-agent activity of the PARP inhibitor olaparib (AZD2281) in homologous recombination deficient triple-negative breast cancer. Cancer Res 2009;69(Suppl):Abstract 5494.

**2**. Rulten SL, Fisher AE, Robert I, Zuma MC, Rouleau M, Ju L, et al. PARP-3 and APLF function together to accelerate nonhomologous end-joining. Mol Cell 2011;41:33-45.

**3**. Pettersen EF, Goddard TD, Huang CC, Couch GS, Greenblatt DM, Meng EC, et al. UCSF Chimera--a visualization system for exploratory research and analysis. J Comput Chem 2004;25:1605-12.

**4**. Choi KH, Chen CJ, Kriegler M, Roninson IB. An altered pattern of cross-resistance in multidrug-resistant human cells results from spontaneous mutations in the mdr1 (P-glycoprotein) gene. Cell 1988;53:519-29.

**Supplementary Tables**

**Suppl Table 1.** MMS combination PF50 cell line assays. Concentration-dependent potentiation of MMS (PF50 ratios).

| **Compound** | **Potentiation factor at 50% growth**  **PF50 (fold-shift MMS IC50) +/- SD (n)** | | |
| --- | --- | --- | --- |
| 10 nM | 30 nM | 200 nM |
| AZD2461 | 2 +/- 0.05 (n = 4) | 3 +/- 0.05 (n = 10) | 15 +/- 1.49 (n = 6) |
| Olaparib | 3 +/- 0.1 (n = 10) | 7.7 +/- 0.06 (n = 10) | 28 +/- 1.19 (n = 10) |

The extent of potentiation of MMS by AZD2461 can be described in terms of a PF50 value, which is calculated as the ratio between the cellular IC50 for MMS divided by the IC50 of MMS in combination with the PARP inhibitor at a single concentration

**Suppl Table 2.** Permeability of AZD2461 and olaparib were assessed in the apical to basolateral direction (a > b) and efflux in the opposite basolateral to apical direction (b > a). The ratio of ‘b > a’ over ‘a > b’ provides an indication of efflux potential with AZD2461 having a relatively low efflux ratio of 1.8 and olaparib has a high efflux ratio of 47.3.

| **Compound** | **CaCo-2 permeability and compound efflux** | | |
| --- | --- | --- | --- |
| **A2B Papp (x106 cm/s)** | **B2A Papp (x106 cm/s)** | **Efflux ratio** |
| AZD2461 | 24.0 | 47.0 | 1.8 |
| Olaparib | 1.74 | 82.1 | 47.3 |

**Suppl Table 3.** Activity of olaparib and AZD2461 alone or in combination with the P-gp inhibitor verapamil in the colorectal cancer cell line HCT-15, which expresses high levels of P-gp.

| **Compound** | **Concentration at 50% inhibition**  **IC50 [µM] +/- SD (n)** | **Fold-shift in IC50 with P-gp inhibitor verapamil** |
| --- | --- | --- |
| Olaparib | 14.9 +/- 0.6 (n = 2) | - |
| Olaparib + verapamil | 2.7 +/- 0.1 (n = 2) | 5.5 |
| AZD2461 | 6.4 +/- 0.5 (n = 3) | - |
| AZD2461 + verapamil | 5.7 +/- 0.3 (n = 3) | 1.1 |

**Supplementary Figures**

**Suppl Fig. 1.** Immunofluorescence for poly(ADP-ribose) in human A549 cells. Cells were pre-treated with vehicle or drugs as shown for 1 hour before treatment with 10 mM hydrogen peroxide and immunolabeled for poly(ADP-ribose) (PAR green). DNA was visualized with DAPI (blue).

**
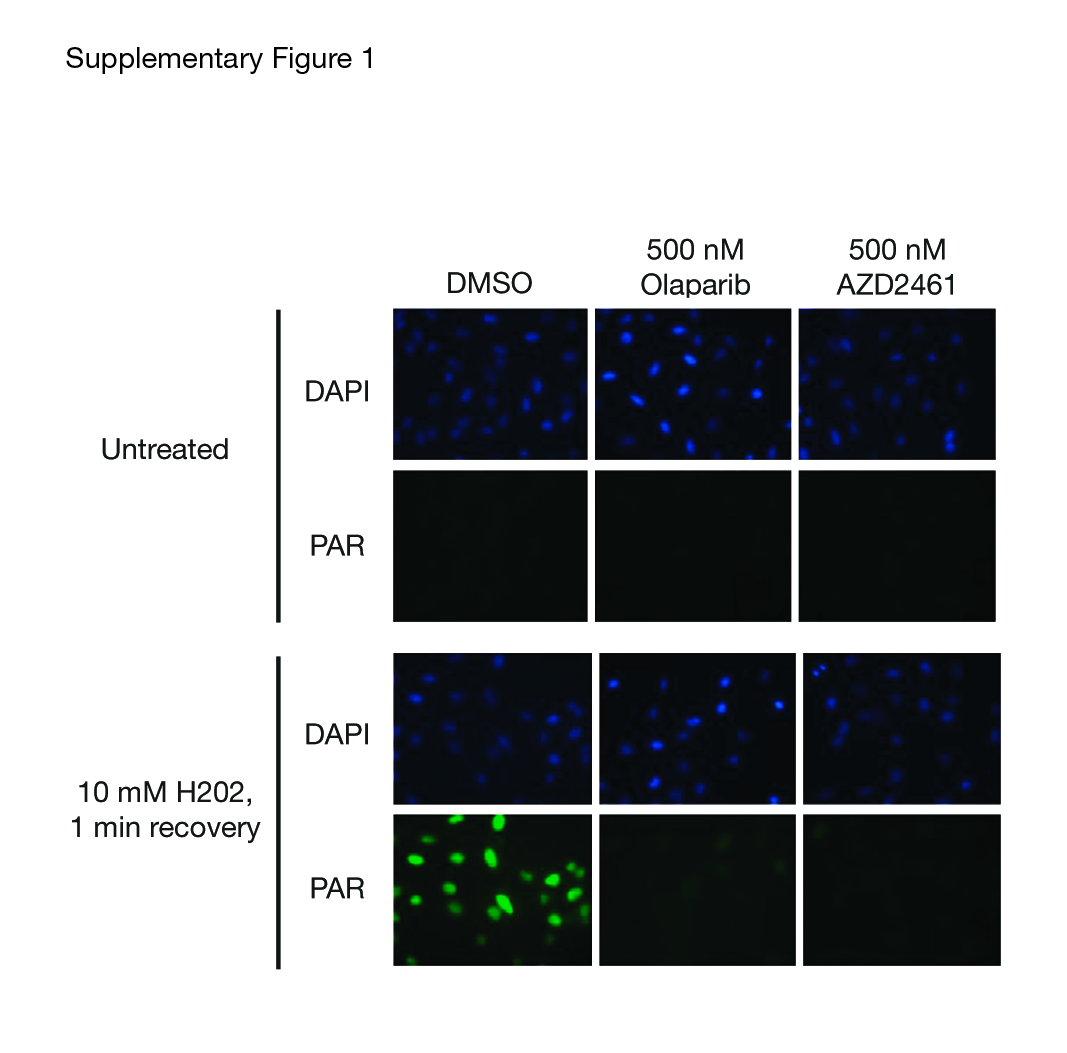
**

**Suppl Fig. 2.** Analysis of both *in vivo* pharmacokinetics (PK) and pharmacodynamics (PD) in tumors taken from SW620 (human colon carcinoma) xenograft-bearing mice after a single treatment with olaparib or AZD2461 at 10mg/kg (top) and 50 mg/kg (bottom) also suggested that the PK profile of both compounds was broadly similar and that AZD2461 induces substantial inhibition of PARP1 activity to levels comparable with olaparib.


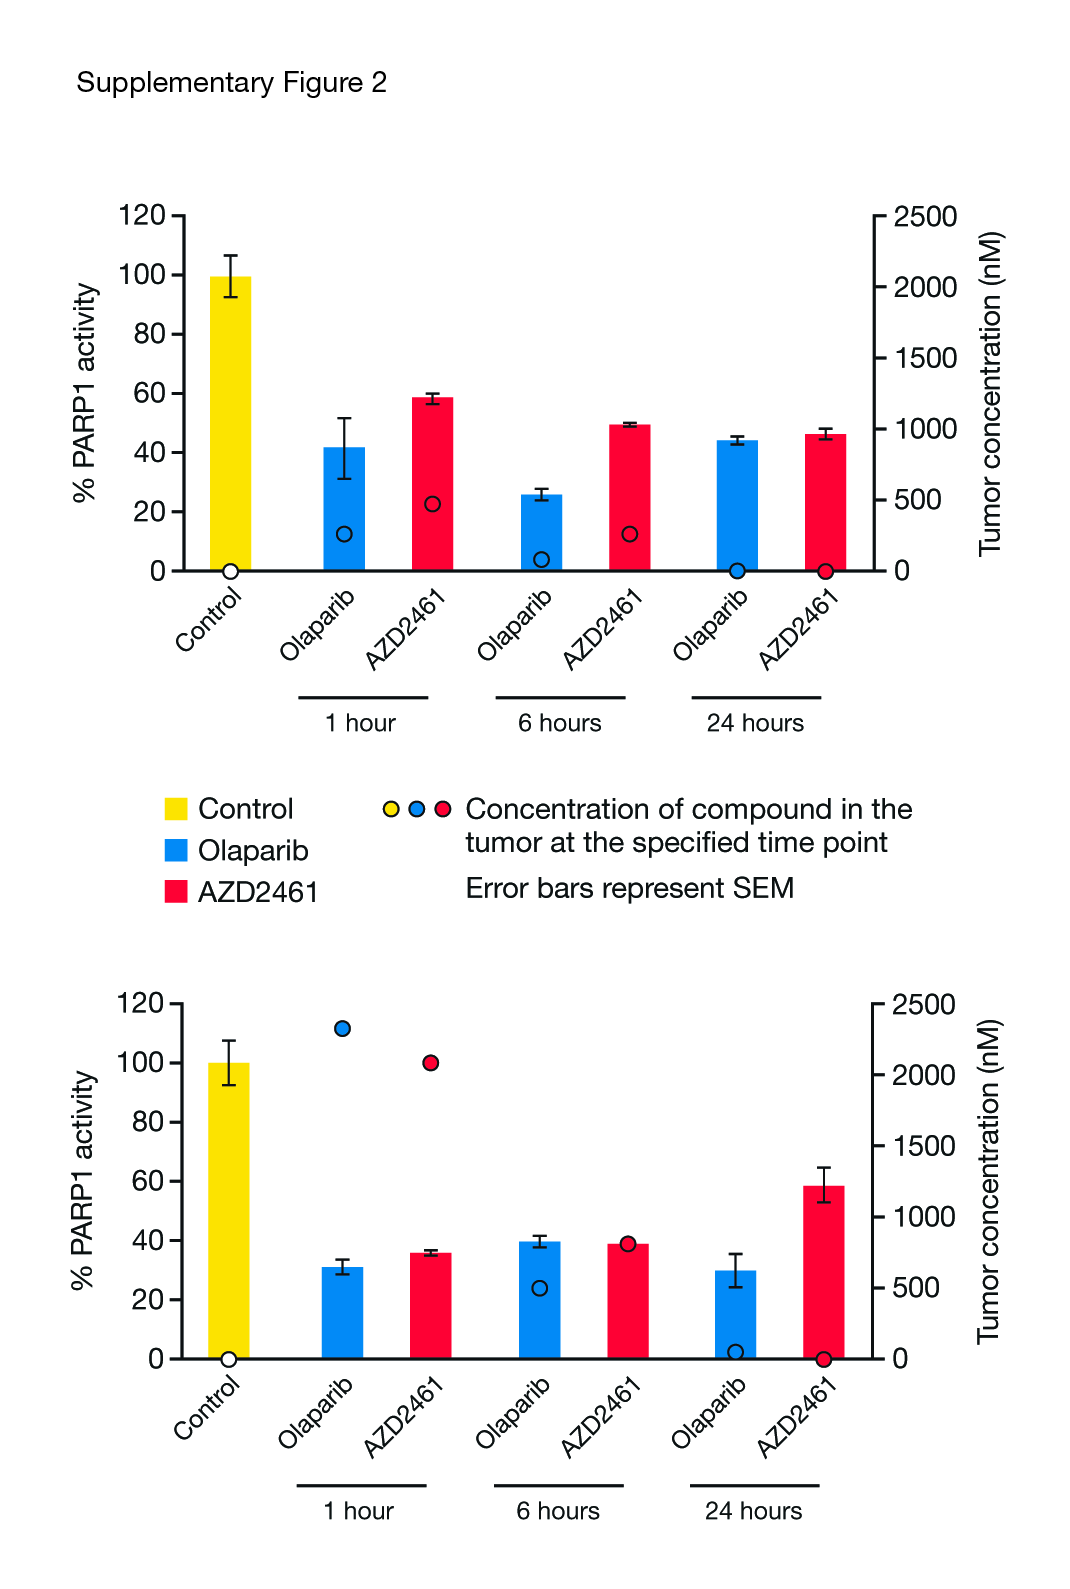


**Suppl Fig. 3.** Colony formation (clonogenic) assays in the intrinsically high P-gp-expressing MRE11-deficient HCT-15 human colorectal cell line. AZD2461 has enhanced single-agent activity compared with olaparib, which is not altered by treatment with the P-gp inhibitor verapamil. Single representative data of three independent experiments are shown.


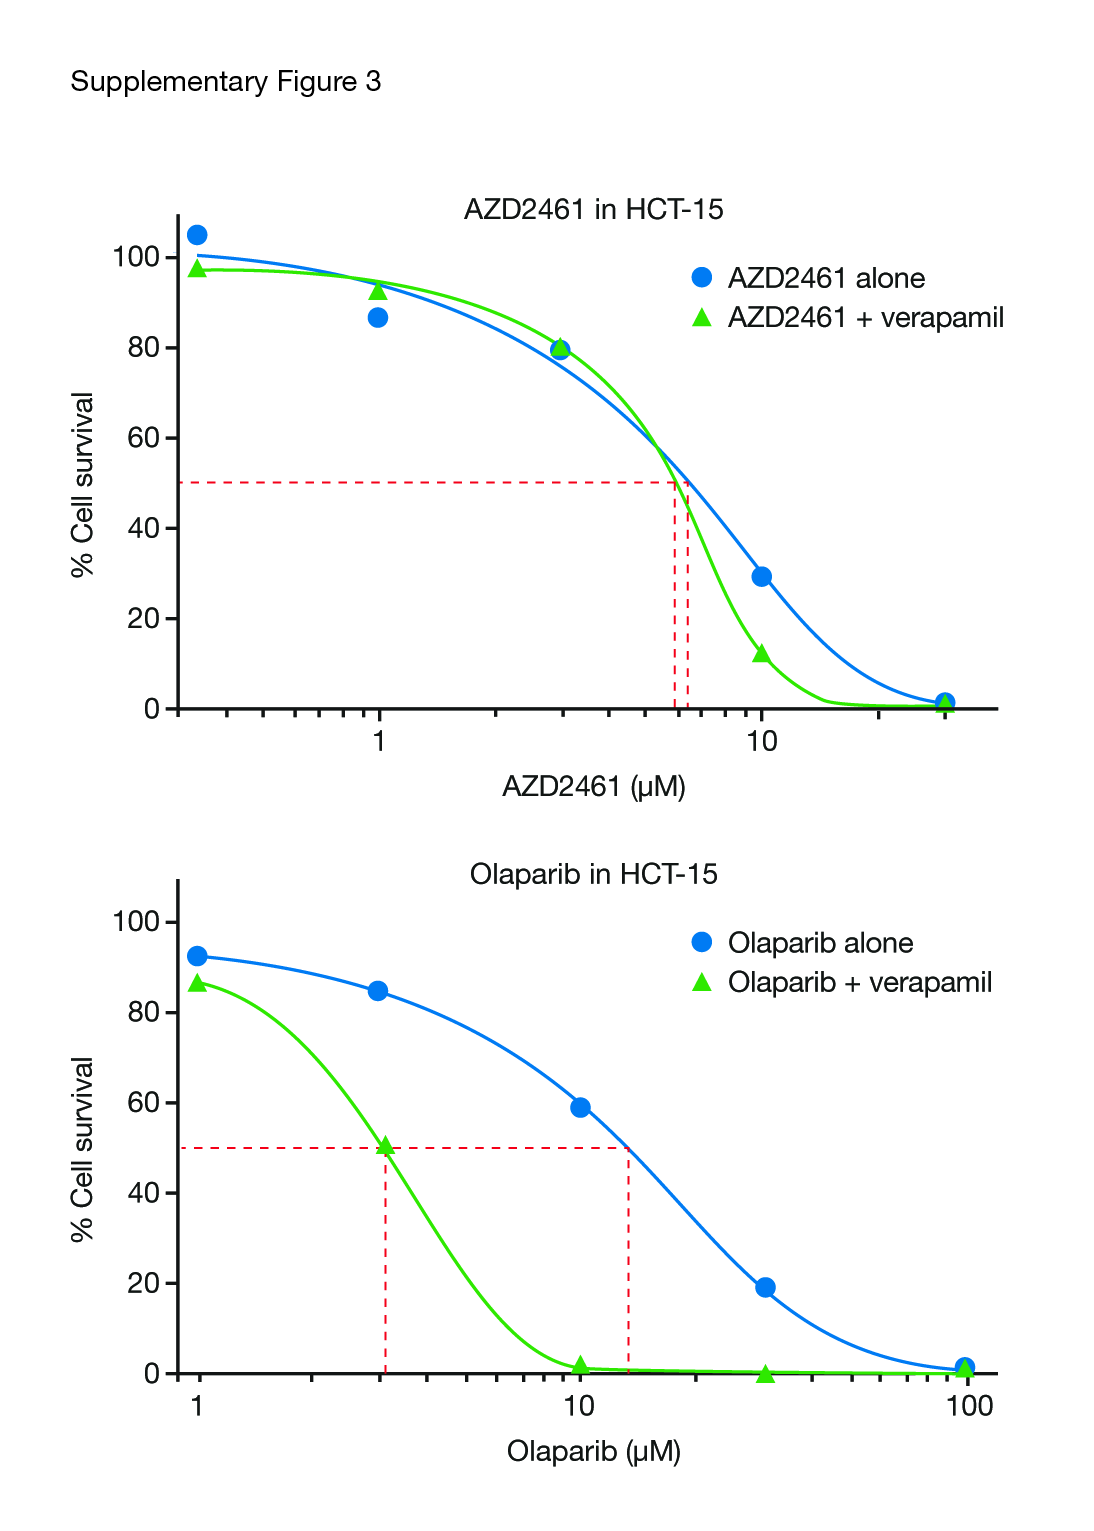


**Suppl Fig. 4. A.** Combination efficacy study in SW620 xenografts: temozolomide (50 mg/kg) + olaparib (1, 3, and 10 mg/kg). Mice were administered five doses of either olaparib, temozolomide (TMZ), or combination of both once daily for 5 days. The efficacy of the treatment is expressed as mean relative tumor volume. Olaparib was not active as a single agent in this model, but combination of 10 mg/kg olaparib with 50 mg/kg TMZ provided significantly better efficacy than TMZ alone. **B.** Efficacy study in SW620 xenografts: temozolomide (50 and 68 mg/kg) and combination of temozolomide (50 mg/kg) plus olaparib (10 mg/kg). Combination of 10 mg/kg olaparib with 50 mg/kg temozolomide (TMZ) provided better efficacy than TMZ even at TMZ’s maximum tolerated dose (68 mg/kg).


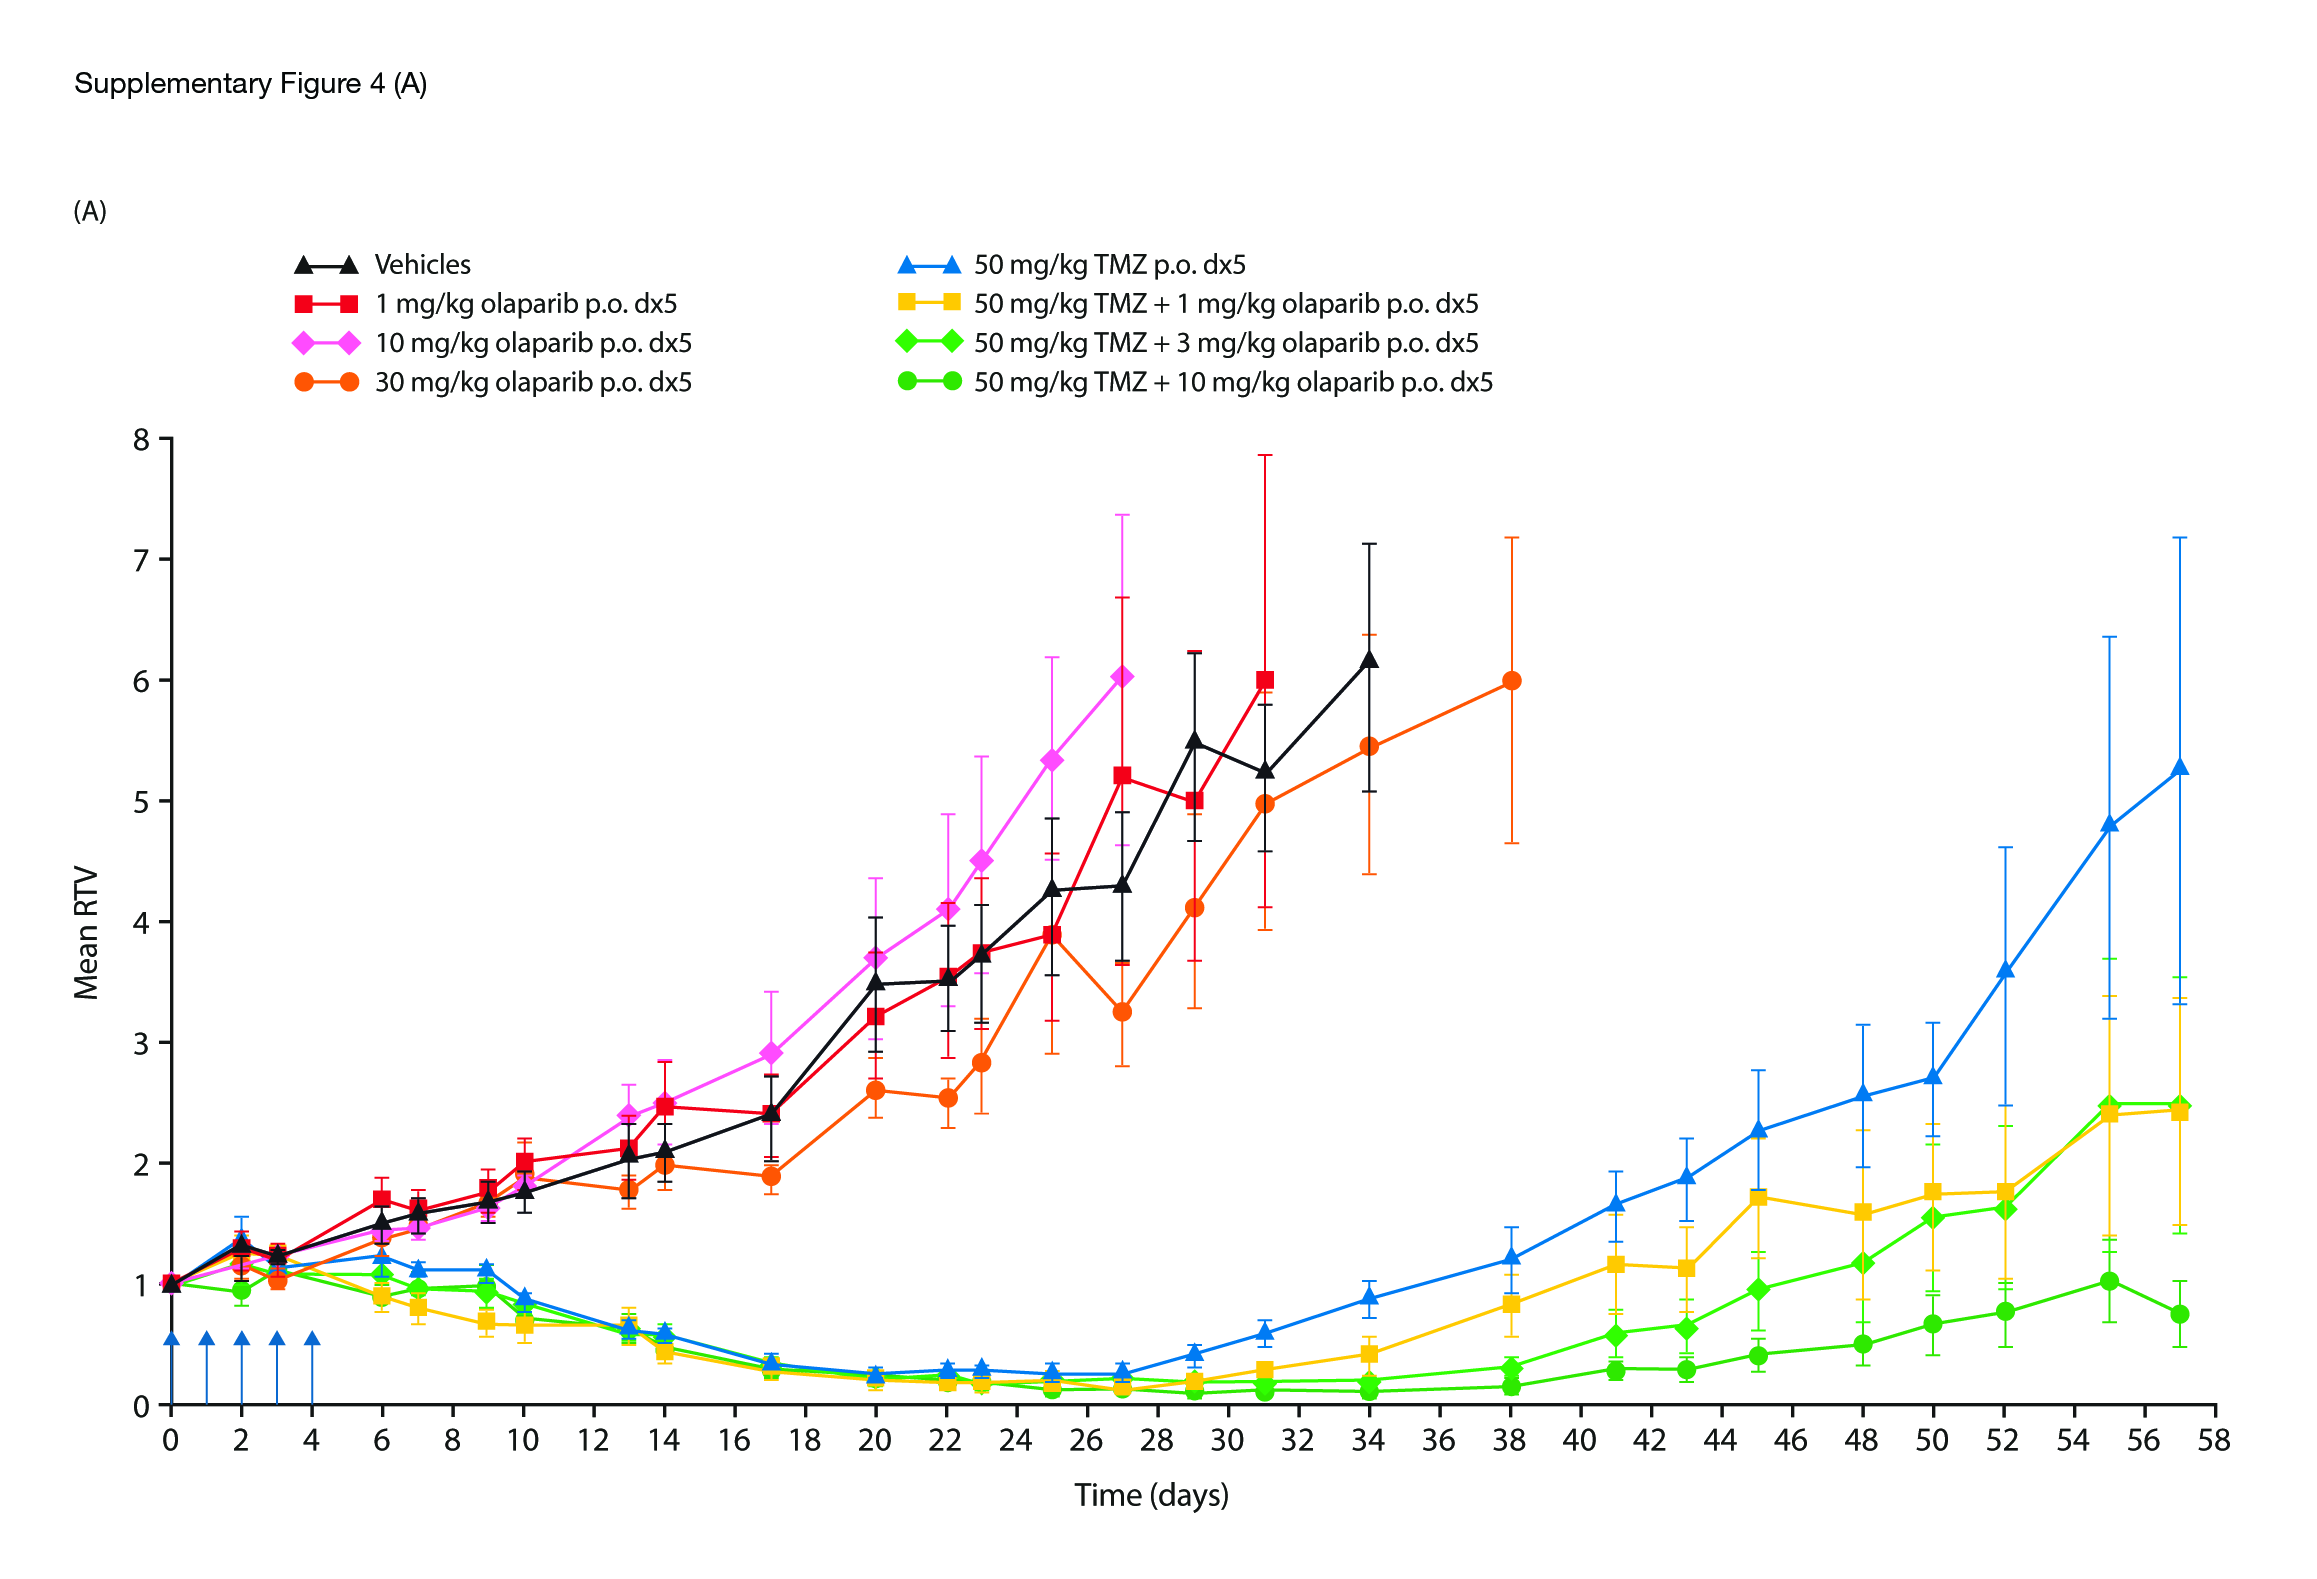


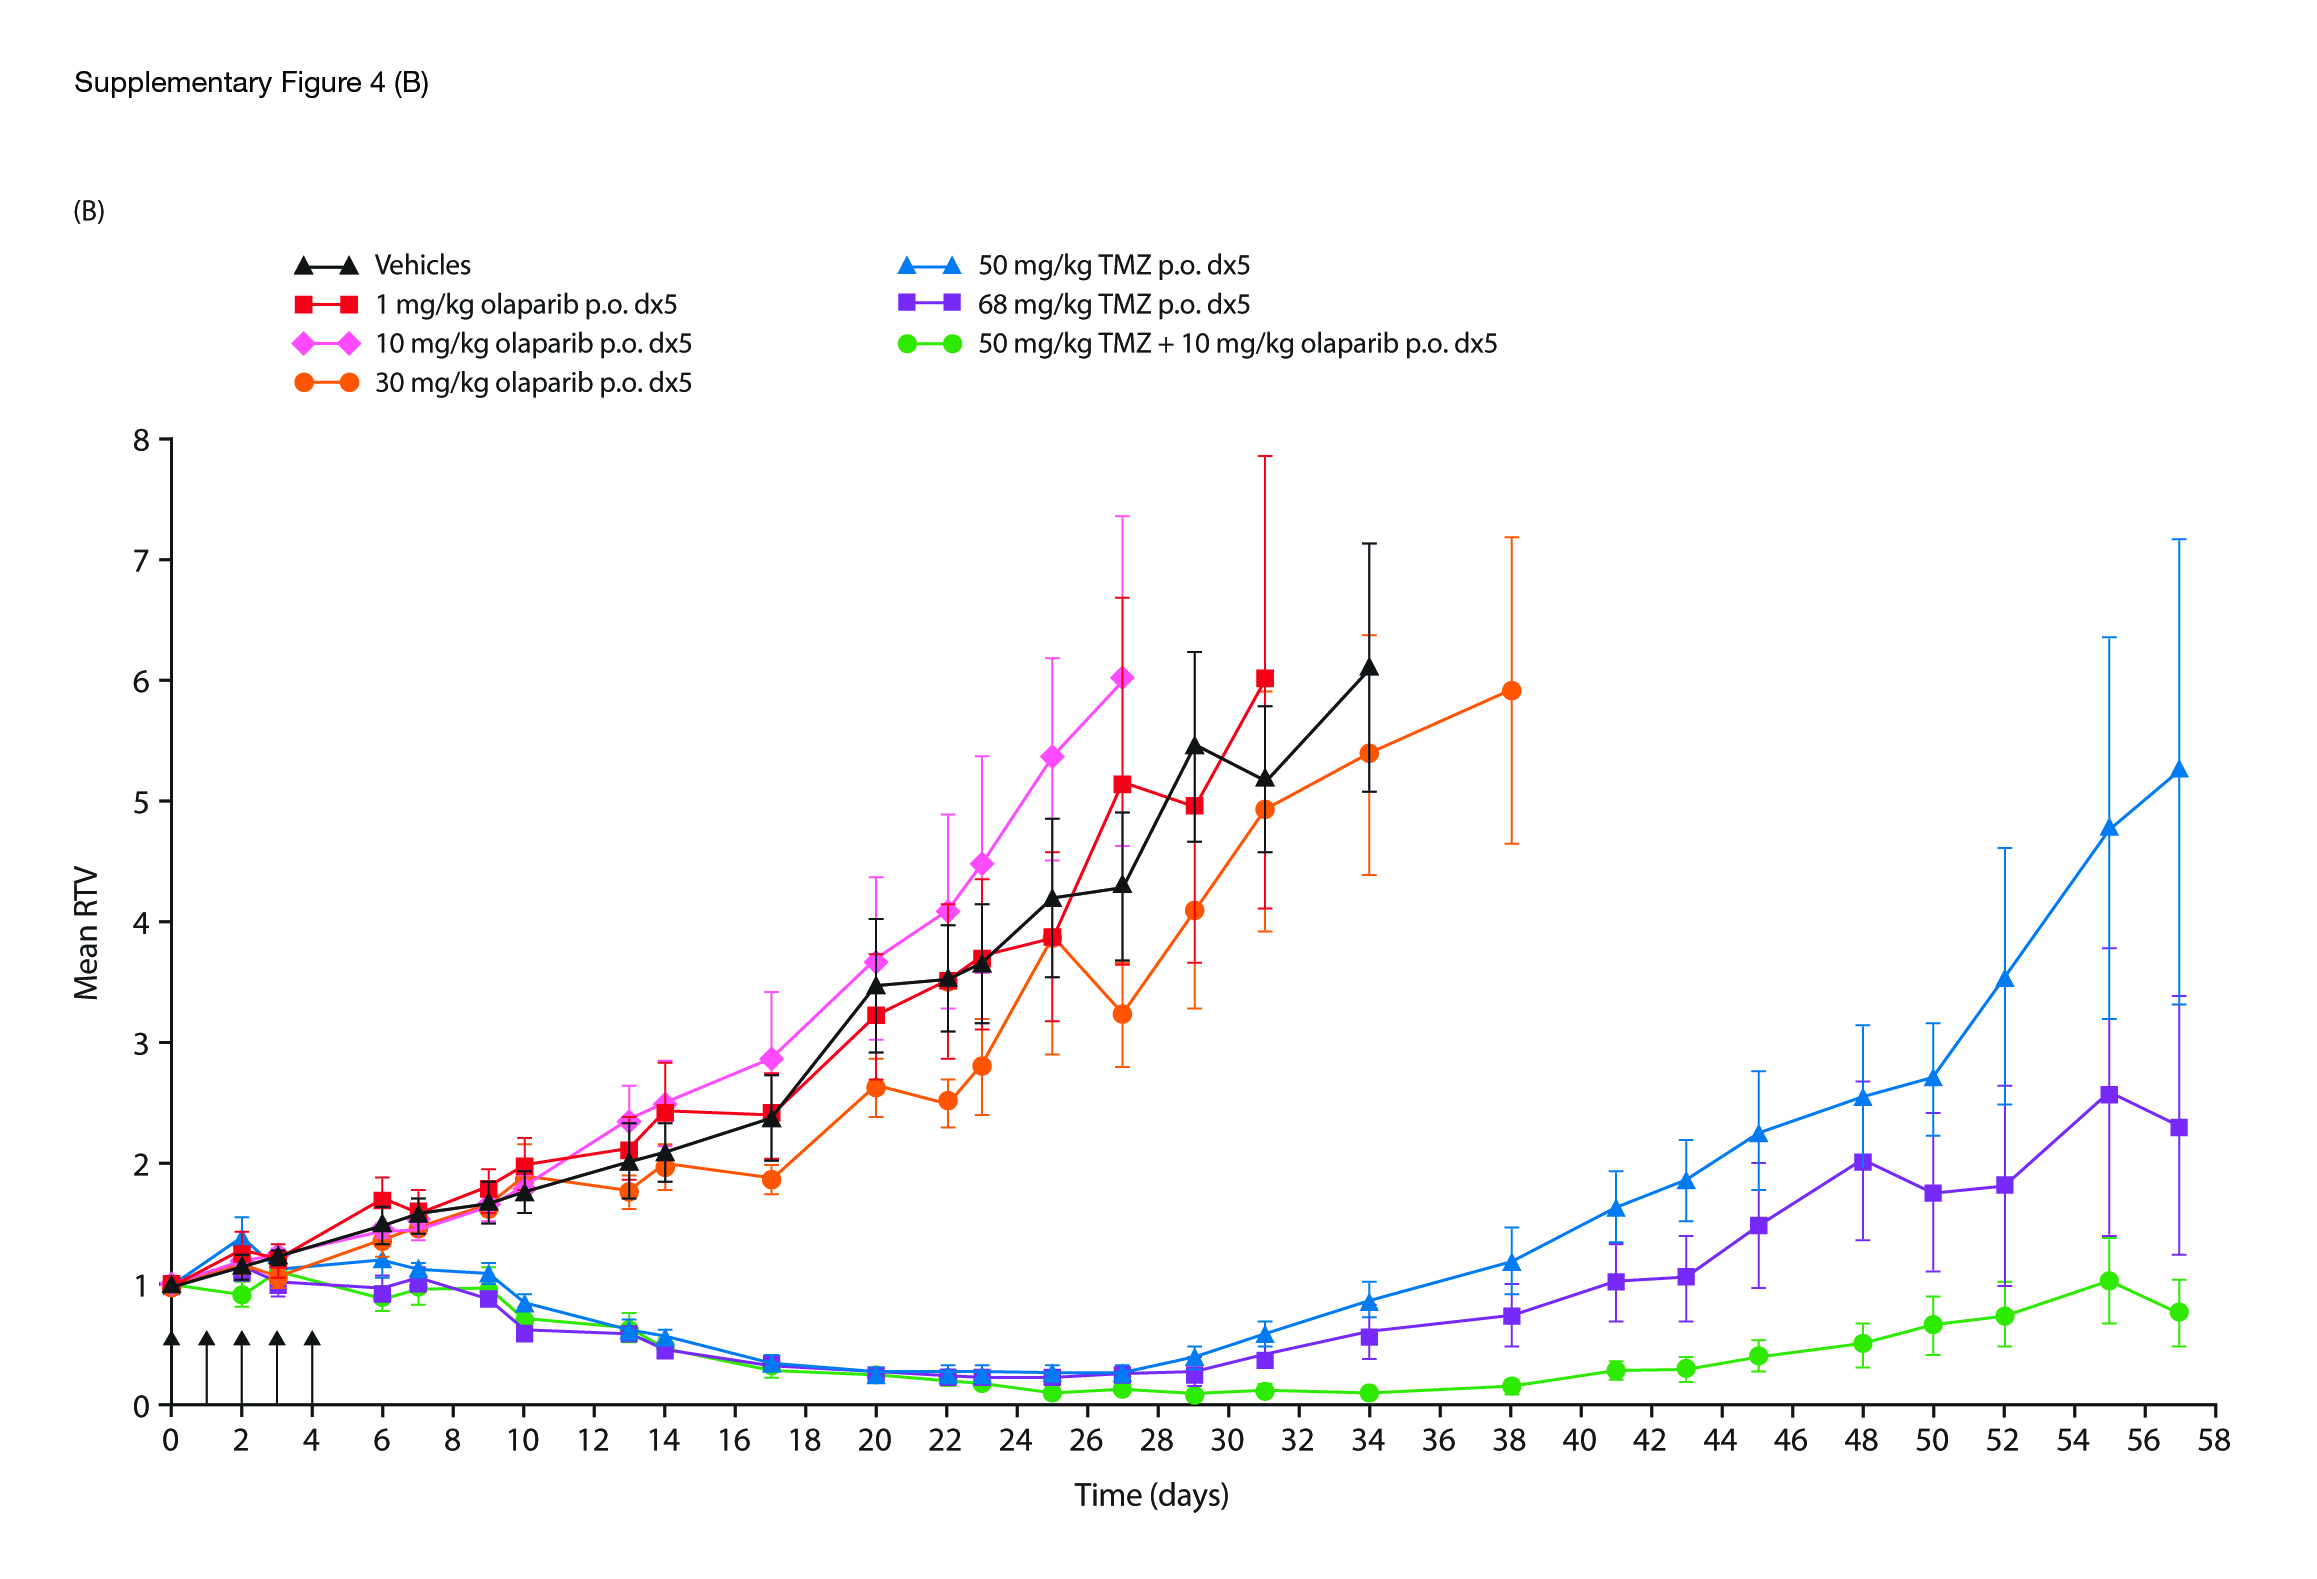


**Suppl Fig. 5.** Relative body weight changes in mice following treatment with 10 mg/kg AZD2461 and olaparib in combination with temozolomide.


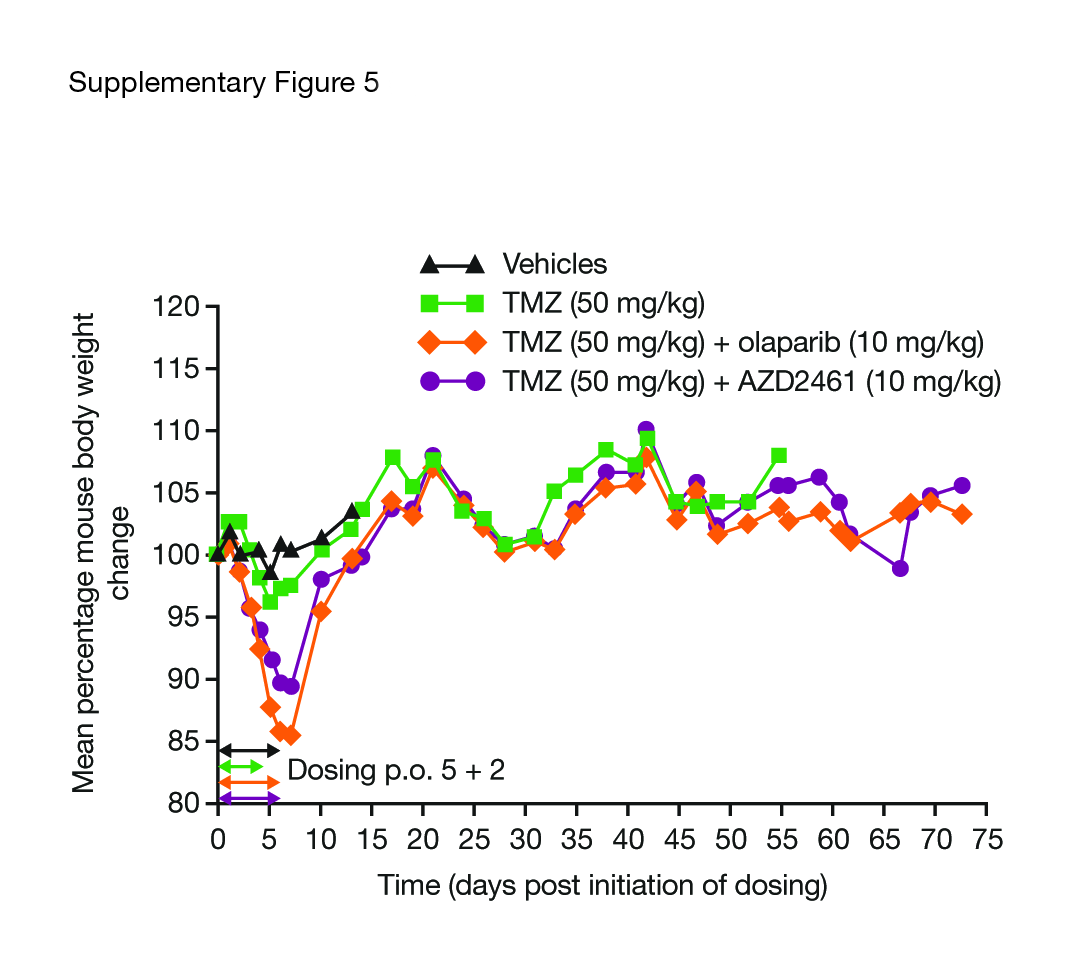


**Suppl Fig. 6.A.** A serial dilution of RNA concentration was used to establish a standard curve for determining the reaction efficiency of PARP1, PARP2, PARP3, and housekeeper gene (PPIA: cyclophilin A) TaqMan RT-PCR assays in both rat and mouse species. The Y axis represents cycle-threshold (Ct) values and the X axis represents log concentration of RNA isolated from rat or mouse tissue. The slope and regression coefficients for individual assays were as following: PARP1 rat (-4.0673 and 0.9988), mouse (-4.0738 and 0.9982). PARP2 rat (-4.0977 and 0.9955), mouse (-4.0376 and 0.993). PARP3 rat (-3.7719 and 0.996), mouse (-3.7665 and 0.9967). PPIA rat (-3.4932 and 0.9996), mouse (-3.4753 and 0.9979). **B.** Determination of optimal reference gene for rat–mouse data normalization. Ct values for PPIA were very similar for rat and mice bone marrow samples, therefore PPIA was suitable housekeeper gene for rat–mouse data normalization.


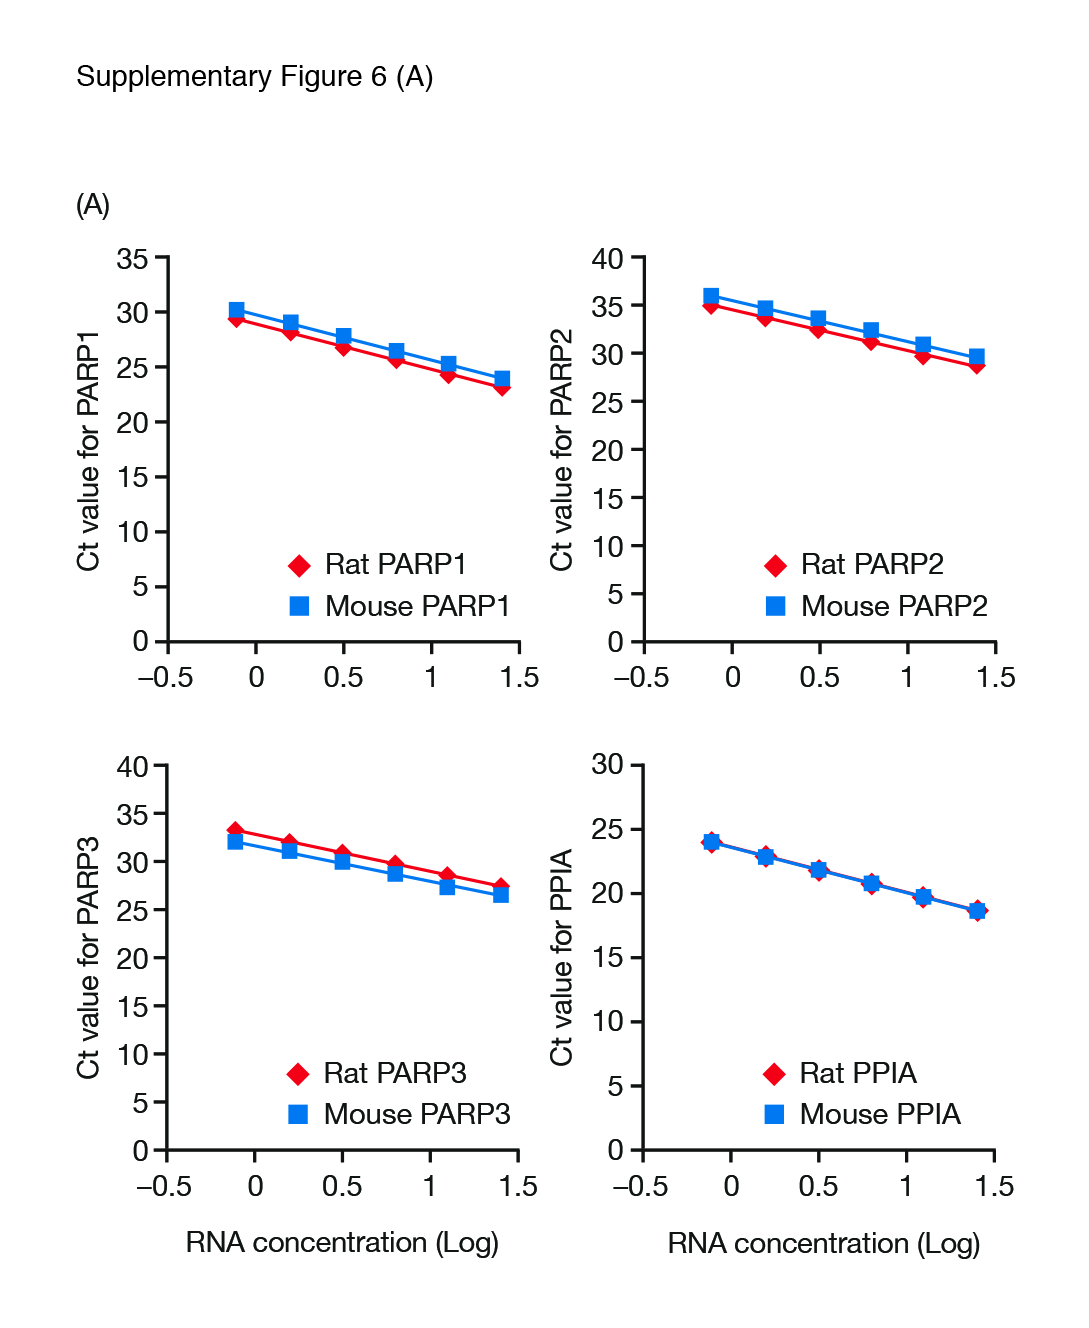


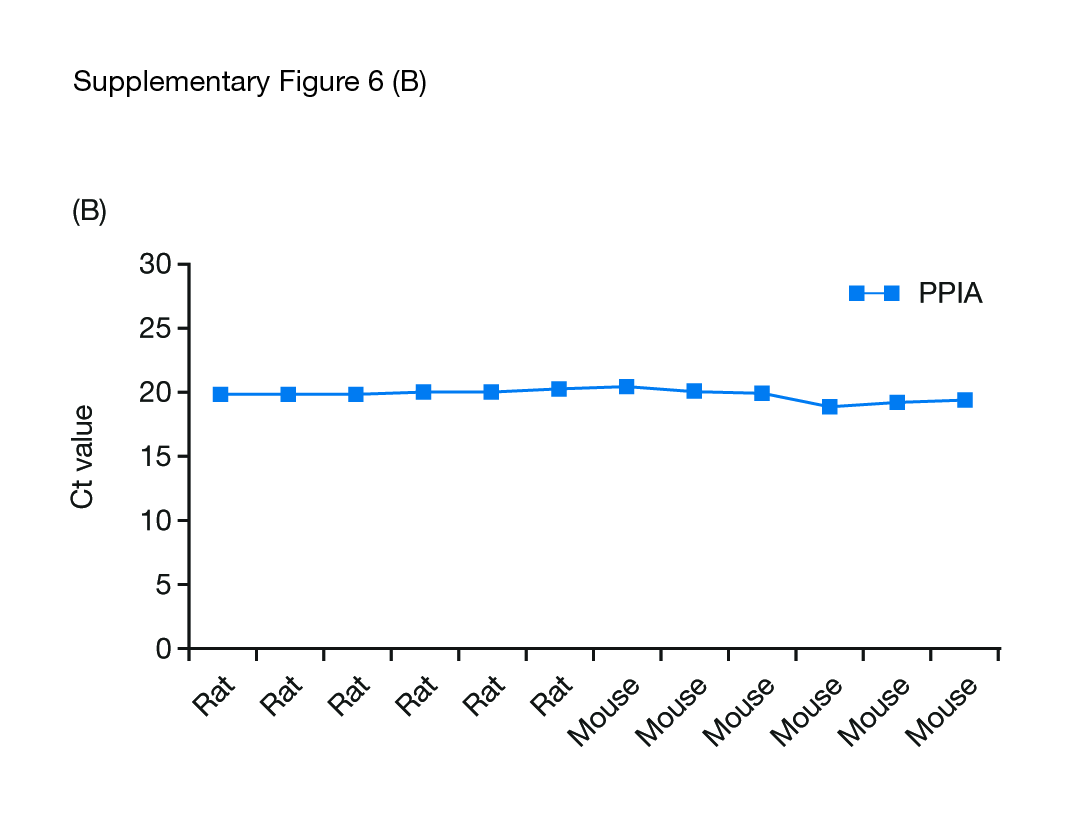


**Suppl Fig. 7.A.** A serial dilution of reference RNA (Qiagen) concentration was used to establish a standard curve for determining the reaction efficiency of PARP3 and housekeeper genes (PPIA: cyclophilin and YWHAZ: tyrosine 3-monooxygenase/tryptohpan 5-monooxygenase activation protein, zeta polypeptide) SybrGreen RT-PCR assays in both rat and human species. The Y axis represents cycle-threshold (Ct) values and the X axis represents log concentration of reference RNA isolated from rat and human tissue. The slope and regression coefficients for individual assays were as following: PPIA rat (-2.6492 and 0.9876), human (‑2.3617 and 0.9542). YWHAZ rat (-2.7609 and 0.9852), human (-2.3269 and 0.9816). PARP3 rat (-2.4395 and 0.8964), human (-2.608 and 0.9864). **B.** Determination of optimal reference gene for rat–human data normalization. Ct values for YWHAZ were very similar for rat and human bone marrow samples compared to PPIA where there was at least a 3 Ct difference between human and rat, suggesting that YWHAZ was a more suitable housekeeper gene for rat–human data normalization.


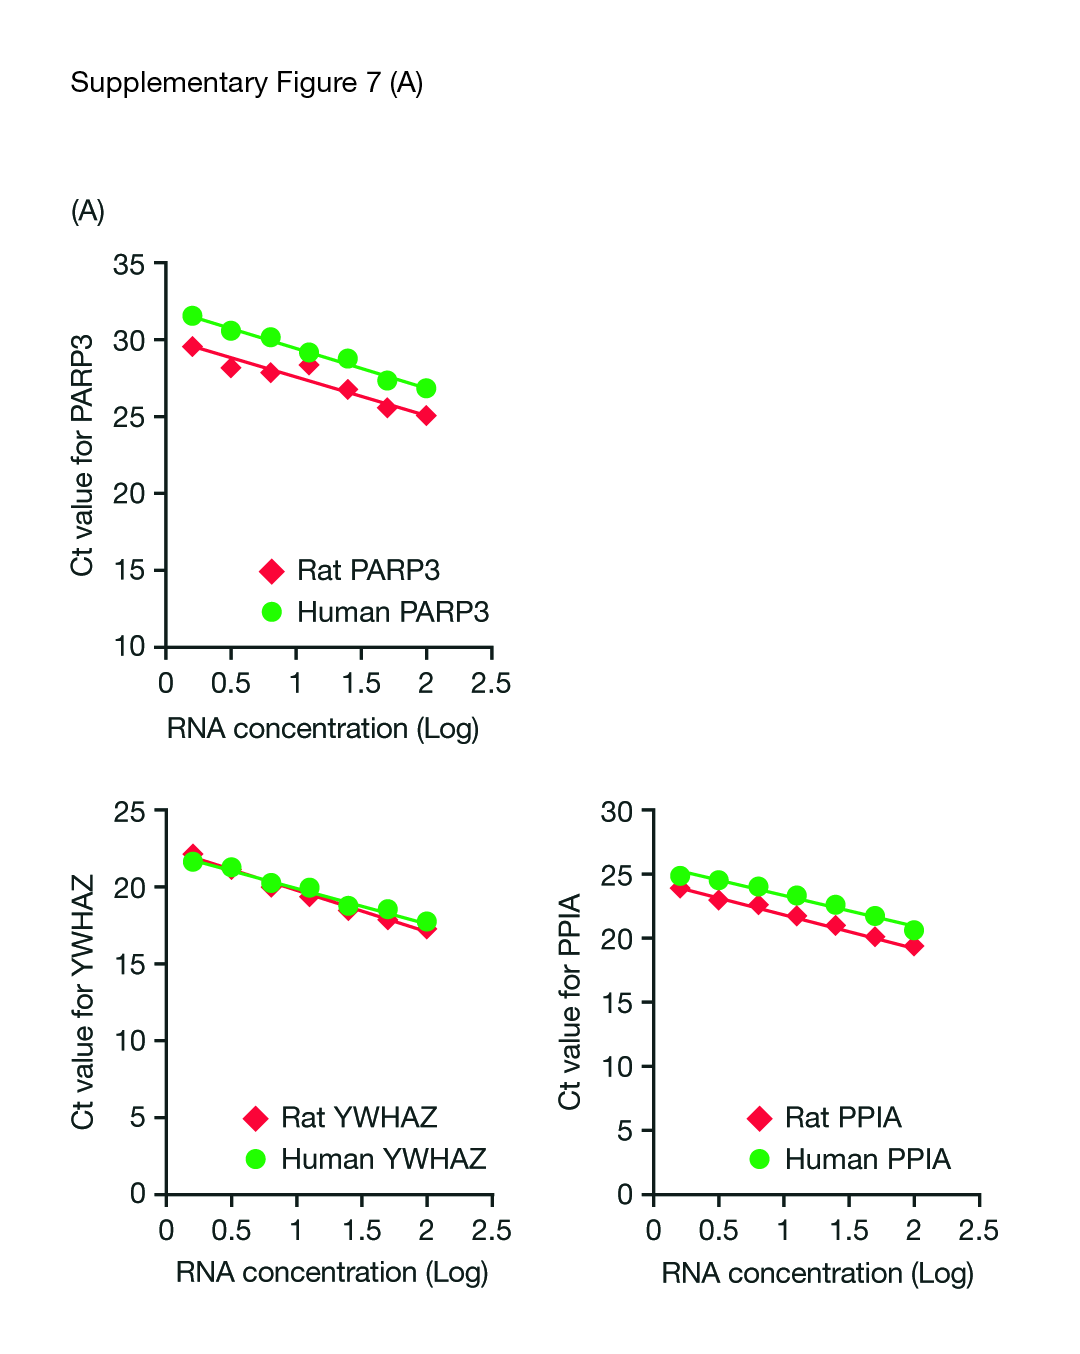


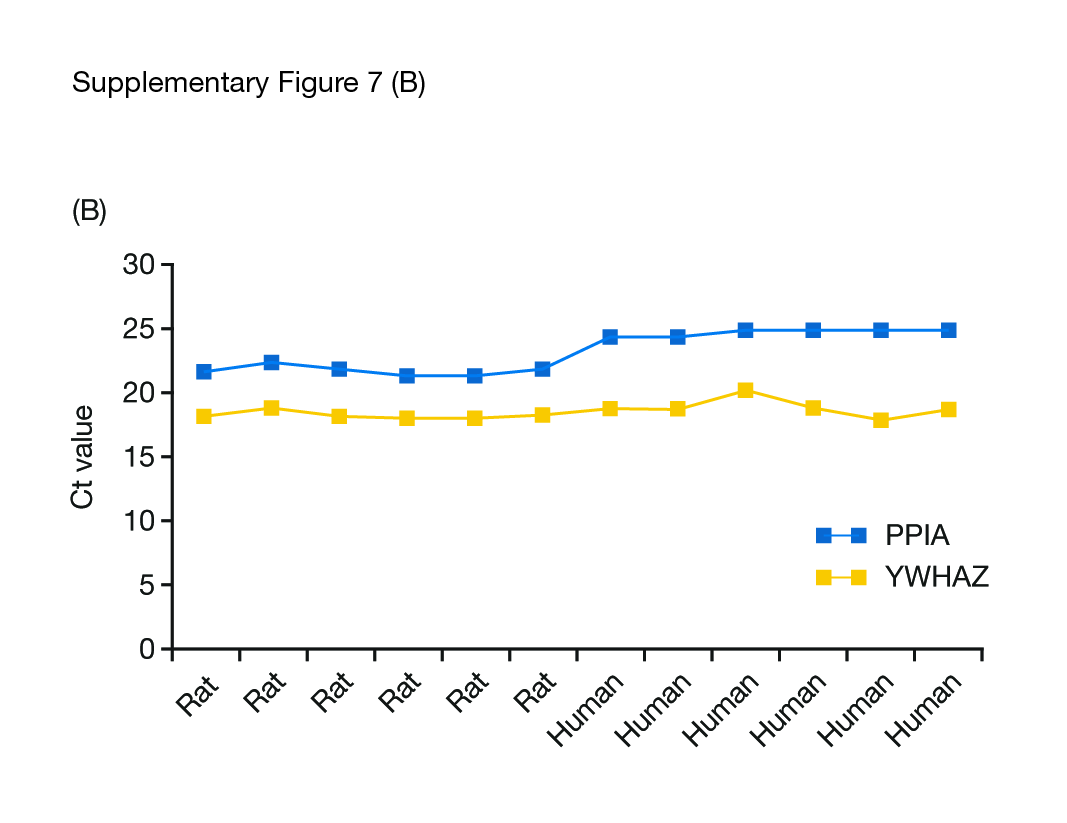


**Suppl Fig. 8.A.** Relative body weight changes in rat following treatment with 10 mg/kg AZD2461 and olaparib in combination with temozolomide. **B.** Relative body weight changes in rat following treatment with 20 mg/kg AZD2461 and olaparib in combination with temozolomide.


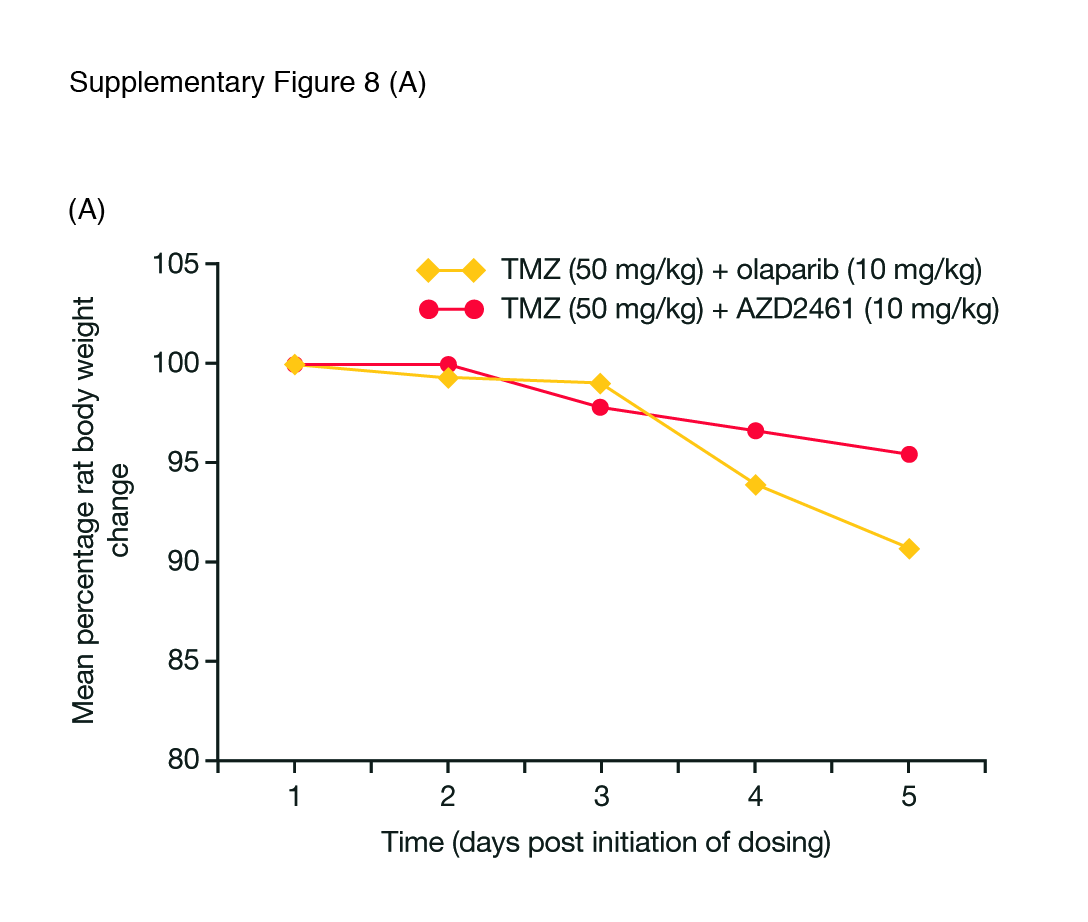


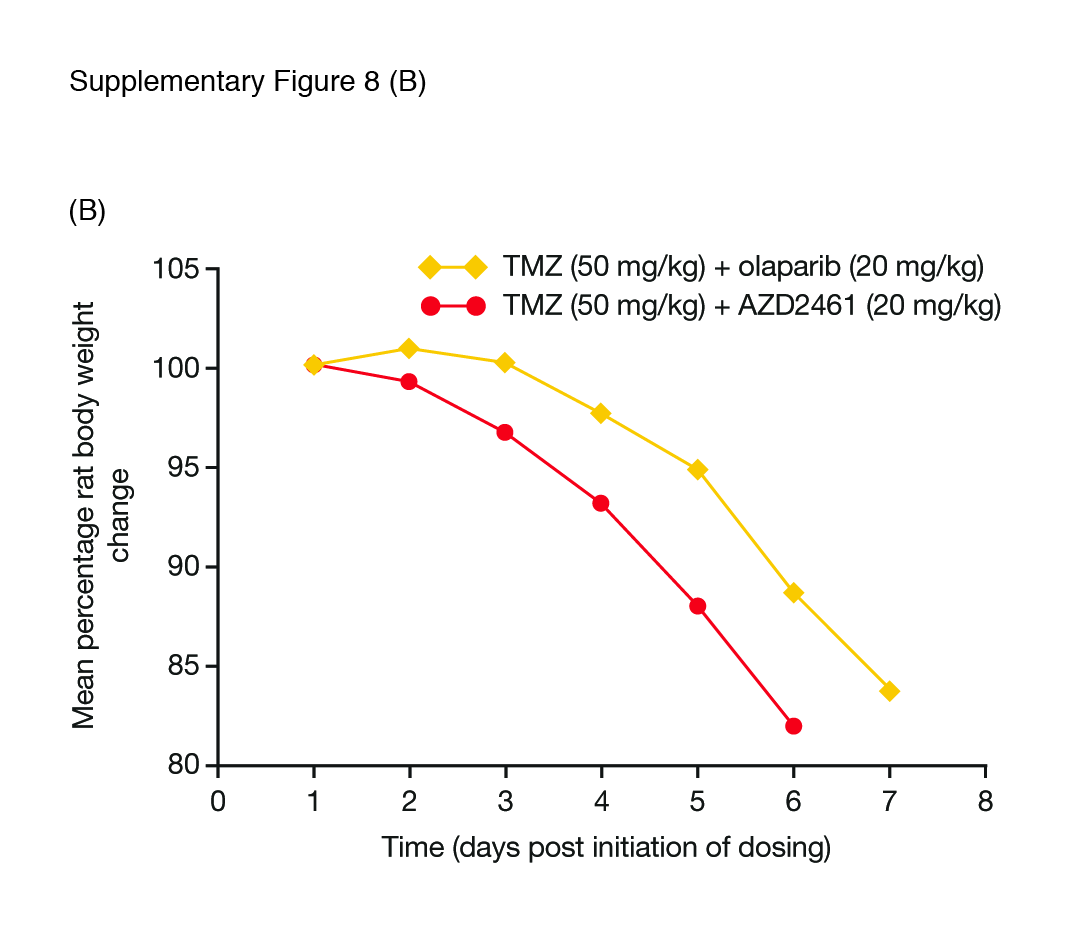

Supplement: 00085472can153240-sup-158791_1_supp_3579565_zz721b.docx [file 00085472can153240-sup-158791_1_supp_3579565_zz721b.docx]
